# Supplementary material for: Effects of dexmedetomidine on stress hormones in patients undergoing cardiac valve replacement: a randomized controlled trial
Source: BMC Anesthesiol. 2020 Jun 6;20:142. doi: 10.1186/s12871-020-00993-0 (PMC7275125; doi:10.1186/s12871-020-00993-0)
Supplement: Supplementary file 1 — Additional file 1. Comparison of plasma Cor, E, NE and 5-HT levels in the two groups (±SD, n=30) [file 12871_2020_993_MOESM1_ESM.docx]

Supplementary material 1. Comparison of plasma Cor, E, NE and 5-HT levels in the two groups (±SD, n=30)

| Index | Group | T0 | T1 | T2 | T3 |
| --- | --- | --- | --- | --- | --- |
| Cor (ng/mL) | Group C | 24.18±9.95 | 38.58±6.90a | 42.47±6.41ab | 44.21±7.45ab |
| Group D | 25.57±9.34 | 31.56±5.84a* | 34.55±7.50a* | 36.66±14.14a* |
| E (pg/μL) | Group C | 2.01±1.68 | 2.68±1.95 | 3.04±2.39 | 3.17±2.22a |
| Group D | 1.75±1.40 | 1.57±1.24* | 1.71±1.22* | 2.10±1.66* |
| NE (pg/μL) | Group C | 2.75±2.02 | 3.66±1.94a | 5.52±2.22ab | 12.11±6.31abc |
| Group D | 2.22±1.22 | 2.66±1.39a* | 3.93±3.12ab* | 8.35±5.55abc* |
| 5-HT (pg/μL) | Group C | 4.85±3.12 | 3.74±2.98 | 8.19±2.81ab | 10.73±5.5abc |
| Group D | 4.61±4.08 | 3.02±1.63 | 6.77±2.63ab* | 8.01±4.72ab* |

T0: baseline; T1: at sternum sawing; T2: at end of extracorporeal circulation; T3: 24 hours after operation.

* *P* < 0.05 as compared with group C.

*a P* < 0.05 as compared with T0.

*b P* < 0.05 as compared with T1.

*c P* < 0.05 as compared with T2.
